# Supplementary material for: The exquisite specificity of human protein arginine methyltransferase 7 (PRMT7) toward Arg-X-Arg sites
Source: PubMed Central journal article supplement (PMC10202292; doi:10.1371/journal.pone.0285812), 2023-05-22

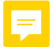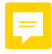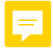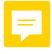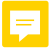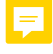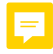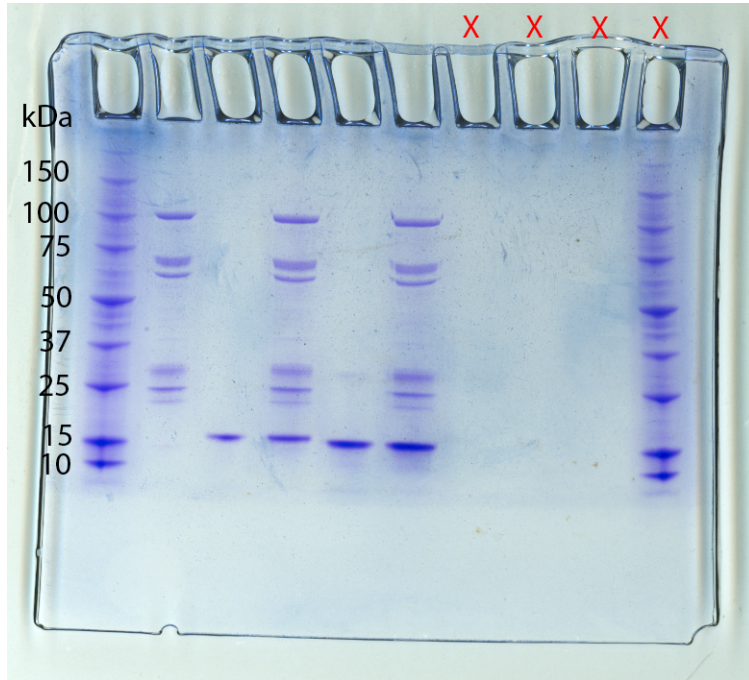

TB pg. 69  
 GST-McPRINT7  
 → Hs M2B  
 → Xc M2B  
 24-hr incubation  
 1 day exposure

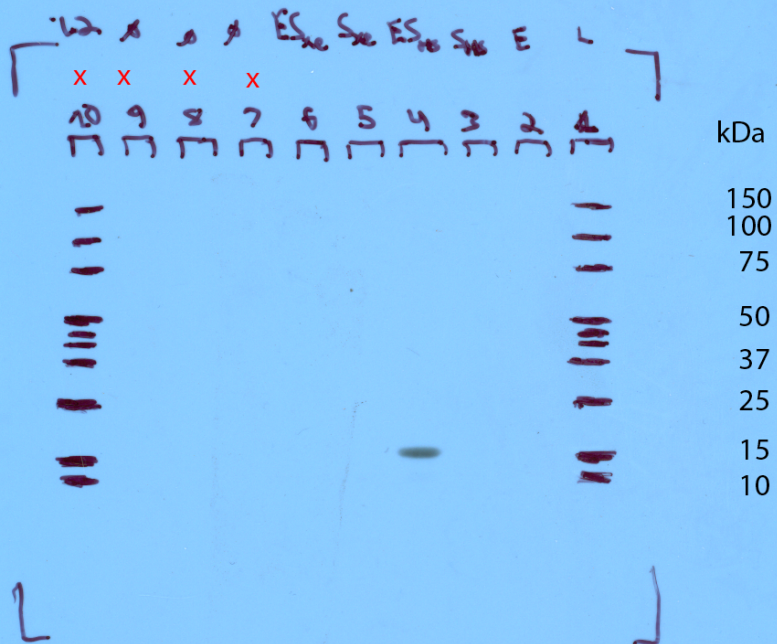

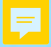

TB pg. 69  
GST-HsPRMT7  
→ H<sub>2</sub> H<sub>2</sub>S  
→ H<sub>2</sub> H<sub>2</sub>S  
24 h. incubation

74 d exposure

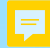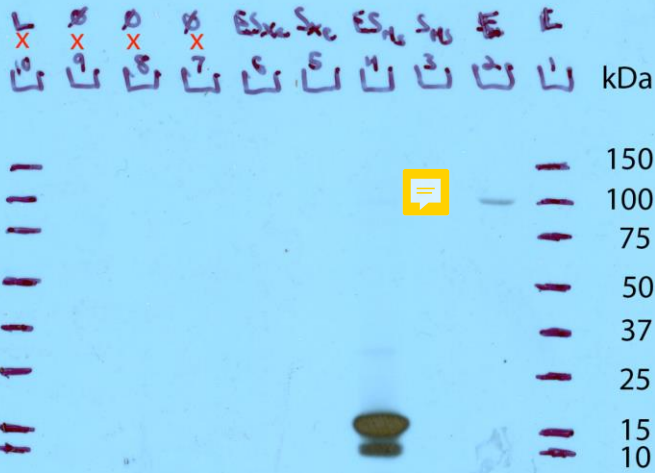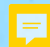

Supplement: pone.0285812.s003.pdf [file pone.0285812.s003.pdf]
